# Supplementary material for: Predicting the growth situation of Pseudomonas aeruginosa on agar plates and meat stuffs using gas sensors
Source: PubMed Central journal article supplement (PMC5150633; doi:10.1038/srep38721), 2016-12-12
Supplement: srep38721-s1.pdf [file srep38721-s1.pdf]

## Supplementary information files

### Predicting the growth situation of *Pseudomonas aeruginosa* on agar plates and meat stuff using gas sensors

Xinzhe Gu<sup>1</sup>, Ye Sun<sup>1</sup>, Kang Tu<sup>1</sup>, Qingli Dong<sup>2</sup> & Leiqing Pan<sup>1\*</sup>

<sup>1</sup>College of Food Science and Technology, Nanjing Agricultural University, No.1, Weigang Road, Nanjing, Jiangsu, 210095, PR China

<sup>2</sup>School of Medical Instrument and Food Engineering, University of Shanghai for Science and Technology, 516 Jun Gong Rd., Shanghai 200093, PR China

**\*Corresponding author:**

Leiqing Pan, Ph.D. Associate professor

College of Food Science and Technology

Nanjing Agricultural University

NO.1 Weigang Road, Nanjing, 210095, P.R. China

Tel.: +86-025-84399016

Email: pan\_leiqing@njau.edu.cn

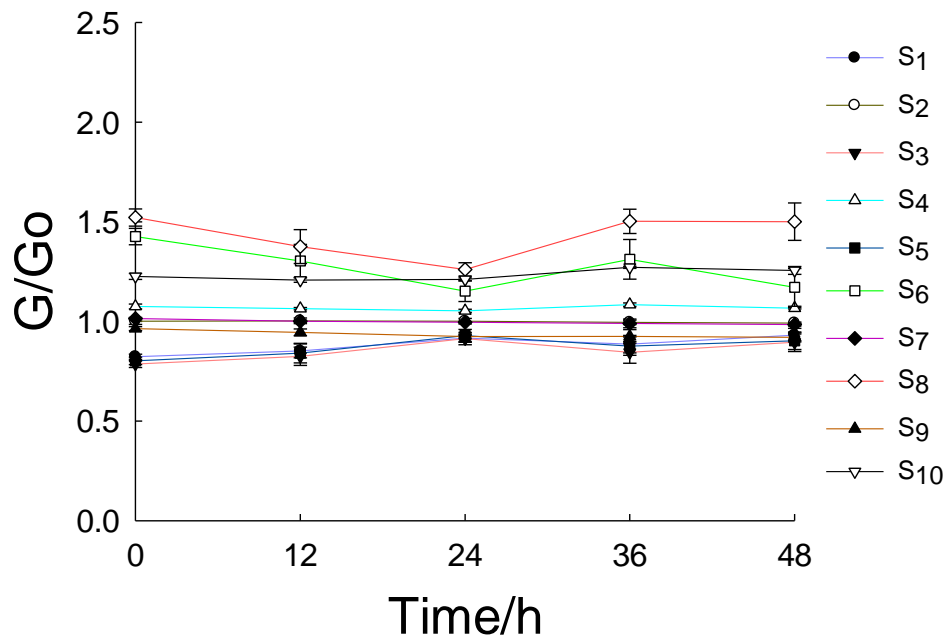

**Supplementary Fig. A1. Average response values of 10 sensors of the control group for agar plates during the inoculation of 48 h**

Refer to **Supplementary Fig. A1** at the point of '*Results/Growth simulation of P. aeruginosa on agar plate by gas sensors/ Gas sensors response.*

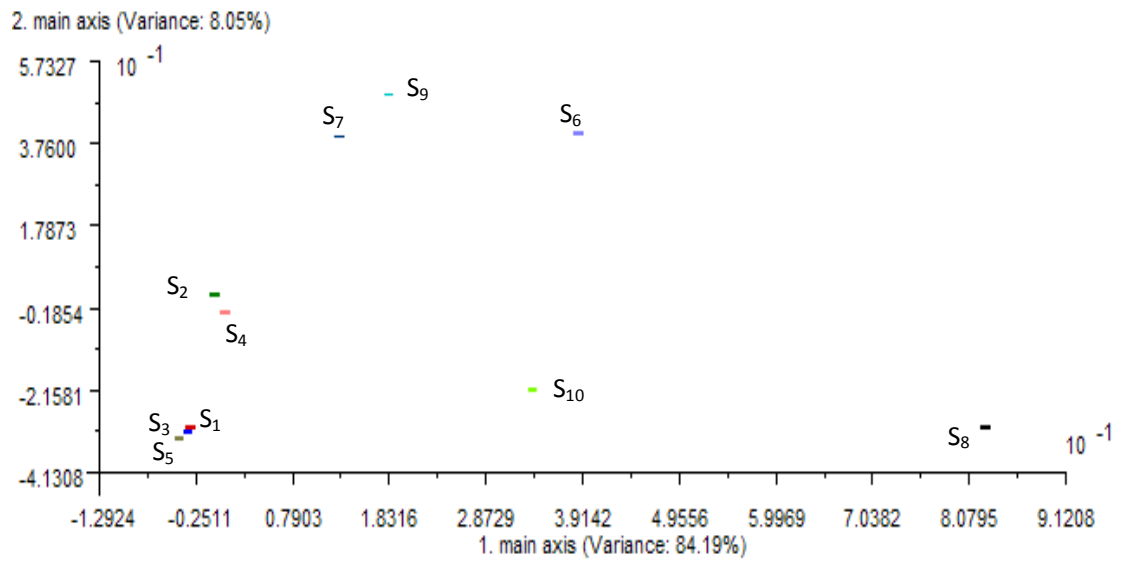

**Supplementary Fig. A2. Loading analysis of *P. aeruginosa* on the agar plates**

Refer to **Supplementary Fig. A2** at the point of 'Results/Growth simulation of *P. aeruginosa* on agar plate by gas sensors/ Sensors selection'.

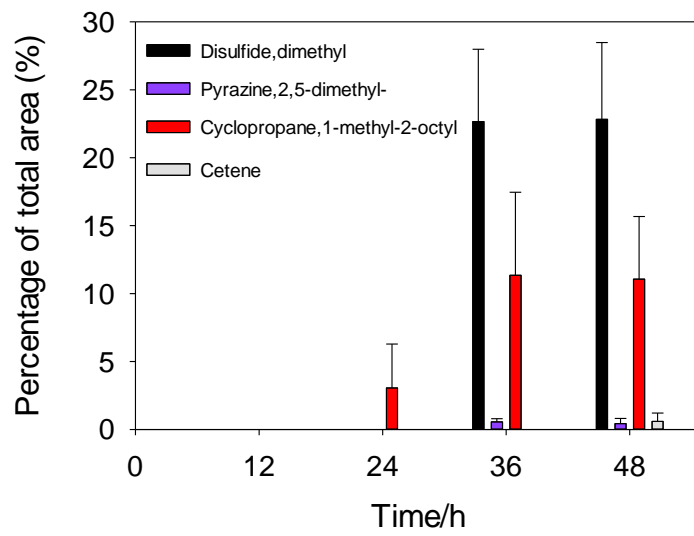

**Supplementary Fig. A3. Some volatile compounds of agar plate samples inoculated with *P. aeruginosa* during 48 h of incubation.**

Refer to **Supplementary Fig. A3** at 'HS-SPME/GC-MS analysis'.

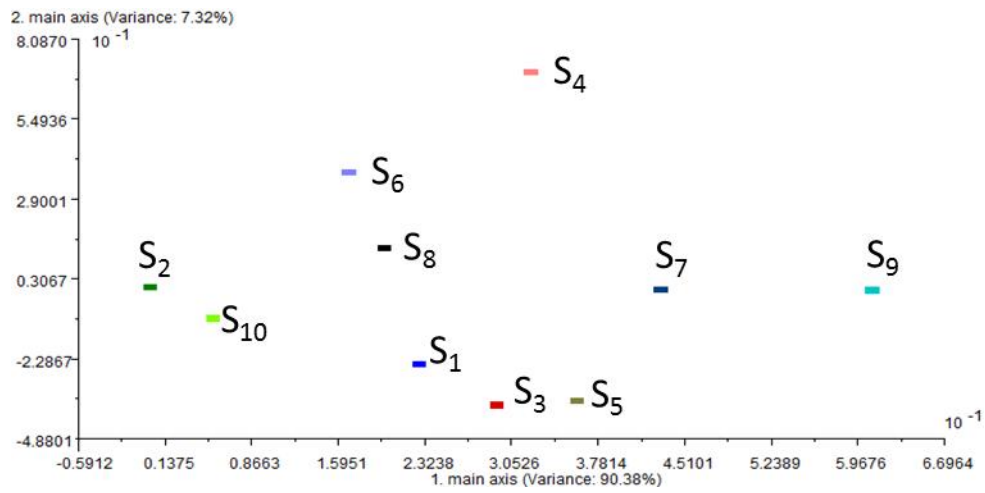

**Supplementary Fig. A4. Loading analysis of *P. aeruginosa* in fresh pork at 20 °C**

Refer to **Supplementary Fig. A4** at the point of 'Results/ Growth simulation of *P. aeruginosa* inoculated in fresh pork by gas sensors/ Sensor selection for growth simulation of *P. aeruginosa* in fresh pork stored at 20 °C'.

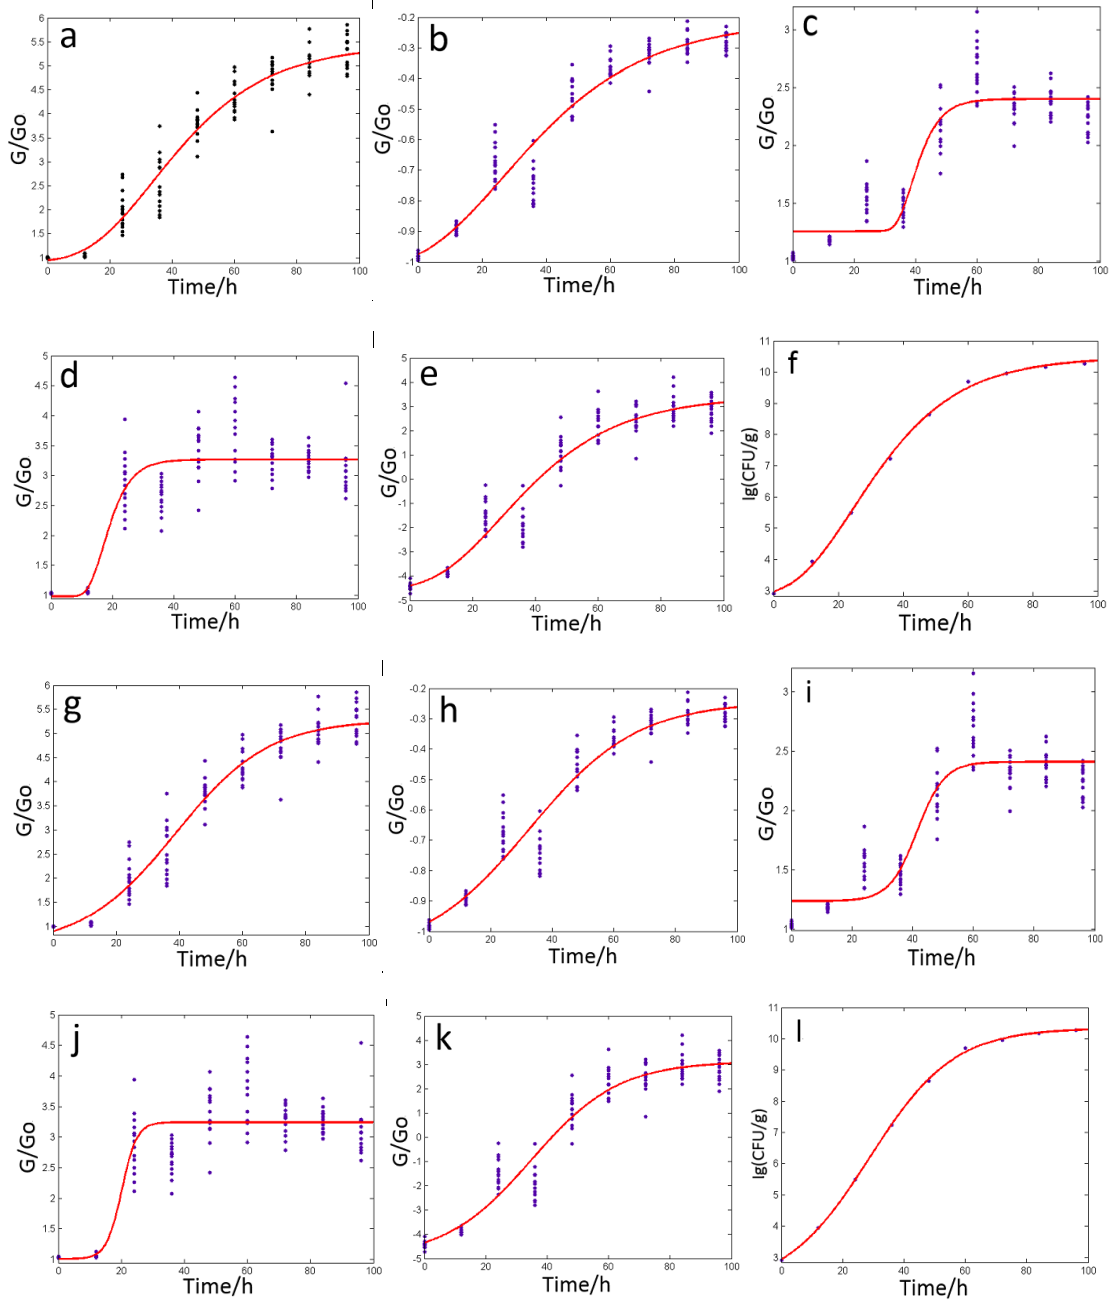

**Supplementary Fig. A5. Fitting the growth curve of for *P. aeruginosa* in fresh pork stored at 20°C**

**(a:  $S_9$ , Gompertz; b:  $S_5$ , Gompertz; c:  $S_8$ , Gompertz; d:  $S_4$ , Gompertz; e: PC 1, Gompertz; f:  $\lg(\text{CFU/g})$ , Gompertz; g:  $S_9$ , Logistic; h:  $S_5$ , Logistic; i:  $S_8$ , Logistic; j:  $S_4$ , Logistic; k: PC 1, Logistic; l:  $\lg(\text{CFU/g})$ , Logistic)**

Refer to **Supplementary Fig. A5** at the point of 'Results/ Growth simulation of *P. aeruginosa* inoculated in fresh pork by gas sensors/ Growth simulation of *P. aeruginosa* in fresh pork stored at 20 °C'.

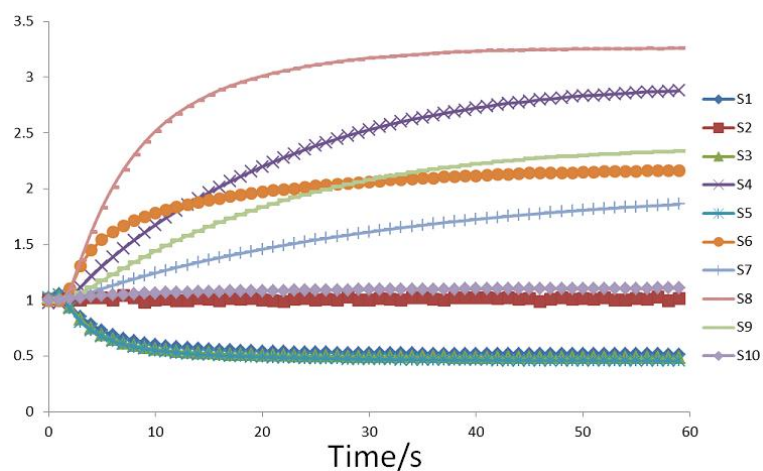

**Supplementary Fig. A6. Response values of 10 sensors of a meat sample inoculated with *P. aeruginosa* at 168 h stored at 4 °C**

Refer to **Supplementary Fig. A6** at the point of 'Results/ Growth simulation of *P. aeruginosa* inoculated in fresh pork by gas sensors/ Growth simulation of *P. aeruginosa* in fresh pork stored at 4 °C'.

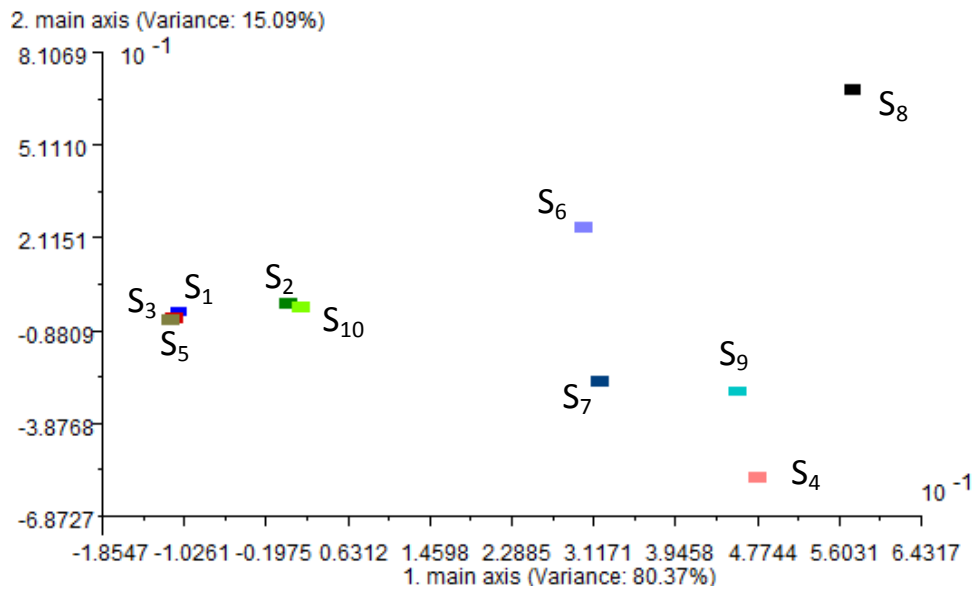

**Supplementary Fig. A7. Loading analysis of *P. aeruginosa* in fresh pork at 4 °C**

Refer to **Supplementary Fig. A7** at the point of 'Results/ Growth simulation of *P. aeruginosa* inoculated in fresh pork by gas sensors/ Growth simulation of *P. aeruginosa* in fresh pork stored at 4 °C.



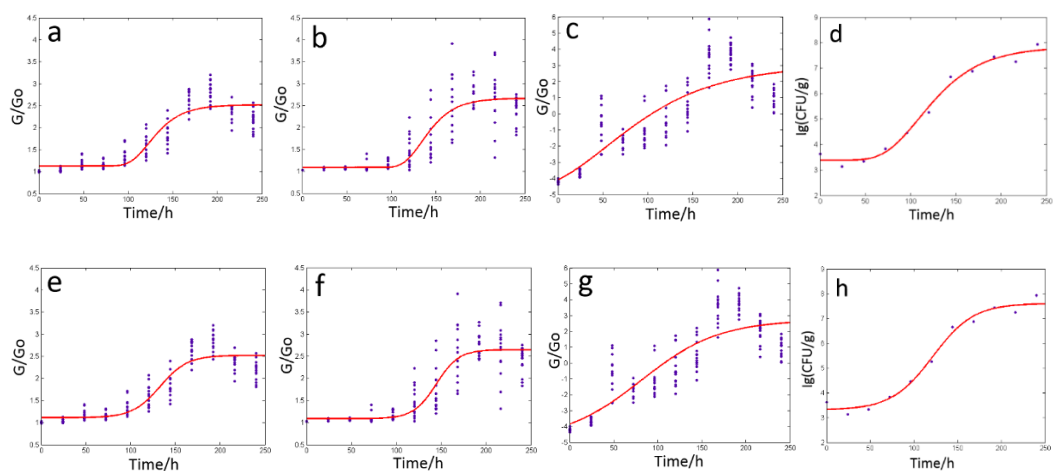

**Supplementary Fig. A8. Fitting the growth curve of for *P. aeruginosa* in fresh pork stored at 4°C**

**(a:  $S_9$ , Gompertz; b:  $S_4$ , Gompertz; c: PC 1, Gompertz; d:  $\lg(\text{CFU/g})$ , Gompertz; e:  $S_9$ , Logistic; f:  $S_4$ , Logistic; g: PC 1, Logistic; h:  $\lg(\text{CFU/g})$ , Logistic)**

Refer to **Supplementary Fig. A8** at the point of '*Results/ Growth simulation of *P. aeruginosa* inoculated in fresh pork by gas sensors/ Growth simulation of *P. aeruginosa* in fresh pork stored at 4 °C.*

**Supplementary Table B1. Variance analysis of *P. aeruginosa* on agar plates**

|      | S <sub>1</sub> | S <sub>2</sub> | S <sub>3</sub> | S <sub>4</sub> | S <sub>5</sub> | S <sub>6</sub> | S <sub>7</sub> | S <sub>8</sub> | S <sub>9</sub> | S <sub>10</sub> |
|------|----------------|----------------|----------------|----------------|----------------|----------------|----------------|----------------|----------------|-----------------|
| 0 h  | 0.798±         | 1.001±0.       | 0.744±0.       | 1.056±0        | 0.746±0        | 1.489±0        | 1.007±0        | 1.593±0        | 0.974±0        | 1.194±          |
|      | 0.019d         | 018ab          | 025d           | .007b          | .029e          | .065b          | .006d          | .08d           | .023d          | 0.009c          |
| 12 h | 0.936±         | 1.004±0.       | 0.941±0.       | 1.058±0        | 0.958±0        | 1.035±0        | 1.004±0        | 1.521±0        | 0.936±0        | 1.340±          |
|      | 0.032a         | 016a           | 048a           | .006b          | .05a           | .085c          | .003d          | .068d          | .013d          | 0.022b          |
| 24 h | 0.826±         | 1.008±0.       | 0.850±0.       | 1.056±0        | 0.850±0        | 1.511±0        | 1.303±0        | 2.339±0        | 1.354±0        | 1.701±          |
|      | 0.030c         | 014a           | 022bc          | .007b          | .022c          | .083b          | .09a           | .097c          | .111a          | 0.053a          |
| 36 h | 0.833±         | 0.997±0.       | 0.822±0.       | 1.061±0        | 0.811±0        | 1.710±0        | 1.190±0        | 2.558±0        | 1.193±0        | 1.703±          |
|      | 0.069c         | 011ab          | 055c           | .006b          | .061d          | .114a          | .1b            | .128b          | .112b          | 0.056a          |
| 48 h | 0.906±         | 0.992±0.       | 0.875±         | 1.079±0        | 0.879±0        | 1.649±0        | 1.064±0        | 2.708±0        | 1.060±0        | 1.737±          |
|      | 0.034b         | 017b           | 0.028b         | .026a          | .029b          | .159a          | .049c          | .239a          | .044c          | 0.086a          |

Values (mean ± standard deviation) are statistically different in the same column with different letter.

Refer to **Supplementary Table B1** at the point of '*Results/Growth simulation of P. aeruginosa on agar plate by gas sensors/ Sensors selection*'.

**Supplementary Table B2. Pearson correlation analysis of *P. aeruginosa* on agar plates.**

|                 | S <sub>1</sub> | S <sub>2</sub> | S <sub>3</sub> | S <sub>4</sub> | S <sub>5</sub> | S <sub>6</sub> | S <sub>7</sub> | S <sub>8</sub> | S <sub>9</sub> | S <sub>10</sub> | IgCFU |
|-----------------|----------------|----------------|----------------|----------------|----------------|----------------|----------------|----------------|----------------|-----------------|-------|
| S <sub>1</sub>  | 1              |                |                |                |                |                |                |                |                |                 |       |
| S <sub>2</sub>  | -0.043         | 1              |                |                |                |                |                |                |                |                 |       |
| S <sub>3</sub>  | 0.909**        | 0.025          | 1              |                |                |                |                |                |                |                 |       |
| S <sub>4</sub>  | 0.243*         | -0.179         | 0.096          | 1              |                |                |                |                |                |                 |       |
| S <sub>5</sub>  | 0.913**        | 0.035          | 0.995**        | 0.081          | 1              |                |                |                |                |                 |       |
| S <sub>6</sub>  | -0.55**        | -0.22*         | -0.624**       | 0.298**        | -0.676**       | 1              |                |                |                |                 |       |
| S <sub>7</sub>  | -0.569**       | 0.077          | -0.237*        | -0.216*        | -0.281**       | 0.411**        | 1              |                |                |                 |       |
| S <sub>8</sub>  | -0.165         | -0.235*        | -0.146         | 0.389**        | -0.213*        | 0.842**        | 0.486**        | 1              |                |                 |       |
| S <sub>9</sub>  | -0.576**       | 0.066          | -0.272*        | -0.177         | -0.319**       | 0.482**        | 0.991**        | 0.547**        | 1              |                 |       |
| S <sub>10</sub> | -0.042         | -0.159         | 0.081          | 0.322**        | 0.009          | 0.669**        | 0.597**        | 0.946**        | 0.639**        | 1               |       |
| IgCFU           | 0.151          | -0.159         | 0.246*         | 0.333**        | 0.177          | 0.525**        | 0.470**        | 0.885**        | 0.499**        | 0.942**         | 1     |

\*: significant difference ( $P<0.05$ ); \*\*: extremely significant difference ( $P<0.01$ )

Refer to **Supplementary Table B2** at the point of '*Results/Growth simulation of P. aeruginosa on agar plate by gas sensors/ Sensors selection*'.

**Supplementary Table B3. Volatile compounds identified by HS-SPME/GC–MS analysis of the control group (agar plate samples) during the incubation of 48 h.**

| No | $r_t^a$ | Volatile Compound      | 0 h            | 12 h           | 24 h | 36 h | 48 h |
|----|---------|------------------------|----------------|----------------|------|------|------|
| 1  | 7.735   | Oxime-,methoxy-phenyl- | + <sup>b</sup> | - <sup>c</sup> | -    | -    | -    |
| 2  | 9.269   | Benzaldehyde           | +              | +              | -    | +    | -    |
| 3  | 10.766  | Octanal                | +              | -              | -    | -    | -    |
| 4  | 14.144  | Nonanal                | +              | -              | -    | +    | -    |
| 5  | 17.268  | Decanal                | +              | +              | +    | -    | +    |
| 6  | 22.23   | Undecanal              | +              | -              | -    | -    | -    |
| 7  | 13.988  | Undecane               | +              | -              | -    | -    | +    |
| 8  | 19.965  | Tridecane              | -              | -              | -    | +    | +    |
| 9  | 26.172  | Pentadecane            | +              | +              | -    | +    | +    |
| 10 | 22.975  | Hexagecane             | +              | -              | -    | -    | +    |

<sup>a</sup>  $r_t$ : retention time; <sup>b</sup> +: detected; <sup>c</sup> -: not detected.

Refer to **Supplementary Table B3** at the point of '*Results/ Growth simulation of P. aeruginosa on agar plate by gas sensors/ HS-SPME/GC–MS analysis*'.

**Supplementary Table B4. Variance analysis of *P. aeruginosa* in fresh pork at 20 °C**

|      | S <sub>1</sub>   | S <sub>2</sub>    | S <sub>3</sub>   | S <sub>4</sub>    | S <sub>5</sub>   | S <sub>6</sub>   | S <sub>7</sub>   | S <sub>8</sub>   | S <sub>9</sub>   | S <sub>10</sub>   |
|------|------------------|-------------------|------------------|-------------------|------------------|------------------|------------------|------------------|------------------|-------------------|
| 0 h  | 0.982±0<br>.008a | 1.007±0.<br>013ab | 0.993±0<br>.01a  | 1.029±0.<br>007f  | 0.983±0<br>.01a  | 1.014±0<br>.013h | 1.005±0<br>.006h | 1.039±0<br>.019h | 0.996±0<br>.009i | 1.061±0.<br>005f  |
| 12 h | 0.892±0<br>.027b | 1±0.012<br>b      | 0.892±0<br>.026b | 1.059±0.<br>023f  | 0.886±0<br>.031b | 1.126±0<br>.021g | 1.05±0.<br>077h  | 1.179±0<br>.024g | 1.065±0<br>.108h | 1.075±0.<br>003ef |
| 24 h | 0.707±0<br>.054c | 1.005±0.<br>015ab | 0.71±0.<br>059c  | 2.845±0.<br>433d  | 0.659±0<br>.067c | 1.827±0<br>.18e  | 1.69±0.<br>293g  | 1.566±0<br>.124e | 2.067±0<br>.394g | 1.088±0.<br>006e  |
| 36 h | 0.799±0<br>.038d | 1.005±0.<br>016ab | 0.804±0<br>.039d | 2.603±0.<br>261e  | 0.75±0.<br>058d  | 1.636±0<br>.13f  | 1.944±0<br>.4f   | 1.449±0<br>.095f | 2.501±0<br>.533f | 1.024±0.<br>005g  |
| 48 h | 0.587±0<br>.07e  | 1.008±0.<br>009ab | 0.57±0.<br>083e  | 3.43±0.3<br>96b   | 0.465±0<br>.066e | 2.671±0<br>.263a | 2.961±0<br>.233e | 2.159±0<br>.182d | 3.818±0<br>.273e | 1.14±0.0<br>13d   |
| 60 h | 0.483±0<br>.035f | 1.013±0.<br>011a  | 0.44±0.<br>037f  | 3.686±0.<br>534a  | 0.364±0<br>.033f | 2.53±0.<br>307b  | 3.283±0<br>.242d | 2.669±0<br>.232a | 4.305±0<br>.37d  | 1.212±0.<br>045c  |
| 72 h | 0.425±0<br>.042g | 1.014±0.<br>012a  | 0.375±0<br>.046g | 3.242±0.<br>241bc | 0.325±0<br>.041g | 2.178±0<br>.171c | 3.582±0<br>.244c | 2.297±0<br>.131c | 4.72±0.<br>352c  | 1.37±0.0<br>63b   |
| 84 h | 0.384±0<br>.032h | 1.014±0.<br>016a  | 0.326±0<br>.035h | 3.326±0.<br>221bc | 0.287±0<br>.035h | 2.158±0<br>.132c | 3.762±0<br>.215b | 2.407±0<br>.117b | 5.03±0.<br>321b  | 1.482±0.<br>054a  |
| 96 h | 0.365±0<br>.025h | 1.012±0.<br>011a  | 0.312±0<br>.026h | 3.142±0.<br>416c  | 0.283±0<br>.029h | 1.996±0<br>.113d | 4.038±0<br>.464a | 2.245±0<br>.13c  | 5.255±0<br>.33a  | 1.463±0.<br>048a  |

Values (mean ± standard deviation) are statistically different in the same column with different letter.

Refer to **Supplementary Table B4** at the point of '*Results/ Growth simulation of P. aeruginosa inoculated in fresh pork by gas sensors/ Sensor selection for growth simulation of P. aeruginosa in fresh pork stored at 20 °C.*

**Supplementary Table B5. Pearson correlation analysis of *P. aeruginosa* in fresh pork at 20 °C**

|                 | S <sub>1</sub> | S <sub>2</sub> | S <sub>3</sub> | S <sub>4</sub> | S <sub>5</sub> | S <sub>6</sub> | S <sub>7</sub> | S <sub>8</sub> | S <sub>9</sub> | S <sub>10</sub> | lg(CFU) |
|-----------------|----------------|----------------|----------------|----------------|----------------|----------------|----------------|----------------|----------------|-----------------|---------|
| S <sub>1</sub>  | 1              |                |                |                |                |                |                |                |                |                 |         |
| S <sub>2</sub>  | -0.284**       | 1              |                |                |                |                |                |                |                |                 |         |
| S <sub>3</sub>  | 0.999**        | -0.287**       | 1              |                |                |                |                |                |                |                 |         |
| S <sub>4</sub>  | -0.815**       | 0.276**        | -0.801**       | 1              |                |                |                |                |                |                 |         |
| S <sub>5</sub>  | 0.995**        | -0.290**       | 0.993**        | -0.846**       | 1              |                |                |                |                |                 |         |
| S <sub>6</sub>  | -0.760**       | 0.252**        | -0.746**       | 0.931**        | -0.809**       | 1              |                |                |                |                 |         |
| S <sub>7</sub>  | -0.964**       | 0.282**        | -0.964**       | 0.816**        | -0.965**       | 0.764**        | 1              |                |                |                 |         |
| S <sub>8</sub>  | -0.916**       | 0.303**        | -0.916**       | 0.892**        | -0.937**       | 0.897**        | 0.905**        | 1              |                |                 |         |
| S <sub>9</sub>  | -0.970**       | 0.294**        | -0.969**       | 0.826**        | -0.973**       | 0.782**        | 0.994**        | 0.917**        | 1              |                 |         |
| S <sub>10</sub> | -0.866**       | 0.296**        | -0.877**       | 0.533**        | -0.831**       | 0.444**        | 0.848**        | 0.717**        | 0.849**        | 1               |         |
| lg(CFU)         | -0.943**       | 0.282**        | -0.941**       | 0.856**        | -0.955**       | 0.806**        | 0.949**        | 0.916**        | 0.962**        | 0.768**         | 1       |

\*: significant difference ( $P<0.05$ ); \*\*: extremely significant difference ( $P<0.01$ )

Refer to **Supplementary Table B5** at the point of 'Results/ Growth simulation of *P. aeruginosa* inoculated in fresh pork by gas sensors/ Sensor selection for growth simulation of *P. aeruginosa* in fresh pork stored at 20 °C'.

**Supplementary Table B6. Variance analysis of *P. aeruginosa* in fresh pork at 4 °C**

|          | S <sub>1</sub>   | S <sub>2</sub>    | S <sub>3</sub>   | S <sub>4</sub>    | S <sub>5</sub>   | S <sub>6</sub>    | S <sub>7</sub>   | S <sub>8</sub>    | S <sub>9</sub>    | S <sub>10</sub>   |
|----------|------------------|-------------------|------------------|-------------------|------------------|-------------------|------------------|-------------------|-------------------|-------------------|
| 0h       | 0.978±<br>0.007a | 1.002±0<br>.009ab | 0.989±<br>0.008a | 1.029±0<br>.003e  | 0.978±<br>0.01a  | 1.024±0<br>.013f  | 1.005±<br>0.006h | 1.052±0<br>.017f  | 0.996±0<br>.011i  | 1.062±0<br>.005e  |
| 24<br>h  | 0.921±<br>0.021b | 1.001±0<br>.014ab | 0.926±<br>0.024b | 1.065±0<br>.042e  | 0.919±<br>0.022b | 1.091±0<br>.032f  | 1.039±<br>0.042h | 1.132±0<br>.038f  | 1.052±0<br>.062hi | 1.073±0<br>.005d  |
| 48<br>h  | 0.635±<br>0.074e | 1.004±0<br>.011ab | 0.587±<br>0.083e | 1.066±0<br>.02e   | 0.563±<br>0.092e | 1.86±0.<br>309bc  | 1.056±<br>0.034h | 2.305±0<br>.493c  | 1.157±0<br>.106h  | 1.058±0<br>.014e  |
| 72<br>h  | 0.727±<br>0.035c | 0.998±0<br>.016b  | 0.678±<br>0.043c | 1.091±0<br>.102e  | 0.646±<br>0.05c  | 1.509±0<br>.1e    | 1.075±<br>0.056h | 1.963±0<br>.253e  | 1.159±0<br>.069h  | 1.056±0<br>.009e  |
| 96<br>h  | 0.69±0.<br>057d  | 1.003±0<br>.015ab | 0.638±<br>0.06d  | 1.155±0<br>.098e  | 0.596±<br>0.063d | 1.605±0<br>.222de | 1.2±0.1<br>03g   | 2.321±0<br>.489c  | 1.366±0<br>.167g  | 1.052±0<br>.01ef  |
| 12<br>0h | 0.646±<br>0.053e | 1.005±0<br>.012ab | 0.6±0.0<br>58e   | 1.418±0<br>.319d  | 0.561±<br>0.059e | 1.63±0.<br>26de   | 1.395±<br>0.183f | 2.254±0<br>.518cd | 1.598±0<br>.228f  | 1.041±0<br>.011g  |
| 14<br>4h | 0.588±<br>0.046f | 1.001±0<br>.014ab | 0.542±<br>0.052f | 1.691±0<br>.443c  | 0.503±<br>0.055f | 1.848±0<br>.278bc | 1.578±<br>0.251e | 2.804±0<br>.667b  | 1.853±0<br>.235e  | 1.044±0<br>.013fg |
| 16<br>8h | 0.481±<br>0.027h | 1.002±0<br>.009ab | 0.451±<br>0.03h  | 2.52±0.<br>579b   | 0.424±<br>0.031h | 2.222±0<br>.293a  | 2.174±<br>0.211b | 3.459±0<br>.573a  | 2.675±0<br>.221b  | 1.113±0<br>.032b  |
| 19<br>2h | 0.465±<br>0.022h | 1.007±0<br>.015ab | 0.439±<br>0.025h | 2.859±0<br>.35a   | 0.415±<br>0.026h | 2.246±0<br>.225a  | 2.321±<br>0.21a  | 3.351±0<br>.559a  | 2.888±0<br>.224a  | 1.131±0<br>.027a  |
| 21<br>6h | 0.535±<br>0.027g | 1.009±0<br>.012a  | 0.505±<br>0.029g | 2.654±0<br>.564ab | 0.469±<br>0.031g | 1.903±0<br>.163b  | 1.988±<br>0.16c  | 2.286±0<br>.249cd | 2.421±0<br>.188c  | 1.091±0<br>.014c  |
| 24<br>0h | 0.571±<br>0.04h  | 1.003±0<br>.011ab | 0.542±<br>0.043f | 2.461±0<br>.298b  | 0.505±<br>0.046f | 1.734±0<br>.113cd | 1.858±<br>0.224d | 2.004±0<br>.17de  | 2.241±0<br>.264d  | 1.075±0<br>.015d  |

Values (mean ± standard deviation) are statistically different in the same column with different letter.

Refer to **Supplementary Table B6** at the point of '*Results/ Growth simulation of P. aeruginosa inoculated in fresh pork by gas sensors/ Growth simulation of P. aeruginosa in fresh pork stored at 4 °C.*

**Supplementary Table B7. Pearson correlation analysis of *P. aeruginosa* in fresh pork at 4 °C**

|                 | S <sub>1</sub> | S <sub>2</sub> | S <sub>3</sub> | S <sub>4</sub> | S <sub>5</sub> | S <sub>6</sub> | S <sub>7</sub> | S <sub>8</sub> | S <sub>9</sub> | S <sub>10</sub> | lg(CFU) |
|-----------------|----------------|----------------|----------------|----------------|----------------|----------------|----------------|----------------|----------------|-----------------|---------|
| S <sub>1</sub>  | 1              |                |                |                |                |                |                |                |                |                 |         |
| S <sub>2</sub>  | -0.109         | 1              |                |                |                |                |                |                |                |                 |         |
| S <sub>3</sub>  | 0.996**        | -0.101         | 1              |                |                |                |                |                |                |                 |         |
| S <sub>4</sub>  | -0.712**       | 0.144*         | -0.663**       | 1              |                |                |                |                |                |                 |         |
| S <sub>5</sub>  | 0.991**        | -0.099         | 0.999**        | -0.648**       | 1              |                |                |                |                |                 |         |
| S <sub>6</sub>  | -0.920**       | 0.096          | -0.916**       | 0.706**        | -0.908**       | 1              |                |                |                |                 |         |
| S <sub>7</sub>  | -0.814**       | 0.138*         | -0.762**       | 0.849**        | -0.747**       | 0.719**        | 1              |                |                |                 |         |
| S <sub>8</sub>  | -0.858**       | 0.066          | -0.861**       | 0.586**        | -0.855**       | 0.958**        | 0.661**        | 1              |                |                 |         |
| S <sub>9</sub>  | -0.850**       | 0.139*         | -0.802**       | 0.866**        | -0.787**       | 0.770**        | 0.993**        | 0.712**        | 1              |                 |         |
| S <sub>10</sub> | -0.440**       | 0.089          | -0.380**       | 0.742**        | -0.349**       | 0.543**        | 0.662**        | 0.477**        | 0.675**        | 1               |         |
| lg(CFU)         | -0.788**       | 0.110          | -0.751**       | 0.848**        | -0.748**       | 0.647**        | 0.879**        | 0.578**        | 0.896**        | 0.462**         | 1       |

\*: significant difference ( $P<0.05$ ); \*\*: extremely significant difference ( $P<0.01$ )

Refer to **Supplementary Table B7** at the point of '*Results/ Growth simulation of P. aeruginosa inoculated in fresh pork by gas sensors/ Growth simulation of P. aeruginosa in fresh pork stored at 4 °C.*



**Supplementary Table B8. Response material and sensitivity of 10 metal oxide sensors**

| Sensor          | Response material                                              | Sensitivity             |
|-----------------|----------------------------------------------------------------|-------------------------|
| S <sub>1</sub>  | Sensitive to aromatic compounds                                | 10ppm                   |
| S <sub>2</sub>  | Sensitive to nitrogen oxides                                   | NO <sub>2</sub> ,1ppm   |
| S <sub>3</sub>  | Sensitive to ammonia and aromatic compounds                    | Benzene,10ppm           |
| S <sub>4</sub>  | Sensitive to hydrogen                                          | H <sub>2</sub> ,100ppb  |
| S <sub>5</sub>  | Sensitive to alkenes and aromatic compounds                    | Propane,1ppm            |
| S <sub>6</sub>  | Sensitive to methane broad range                               | CH <sub>3</sub> ,100ppm |
| S <sub>7</sub>  | Sensitive to sulphur compounds                                 | H <sub>2</sub> S,1ppm   |
| S <sub>8</sub>  | Sensitive to alcohols and partially aromatic compounds         | CO,100ppm               |
| S <sub>9</sub>  | Sensitive to aromatics compounds and sulphur organic compounds | H <sub>2</sub> S,1ppm   |
| S <sub>10</sub> | Sensitive to alkane                                            | CH <sub>3</sub> ,100ppm |

Refer to **Supplementary Table B8** at the point of '*Materials and methods/ Electronic nose trials*'.
